# Supplementary material
Source: HighWire-hosted journal article supplement (https://www.jrheum.org/highwire/filestream/34963/field_highwire_adjunct_files/0/181064DataSuppl.pdf)
Supplement: 181064DataSuppl.pdf [file 181064DataSuppl.pdf]

## ONLINE SUPPLEMENTARY DATA

**SUPPLEMENTARY TABLE 1: RELIABILITY OF MRI READINGS IN ARCTIC. INTRA-CLASS CORRELATIONS, TWO-WAY MIXED-EFFECTS MODEL, ABSOLUTE AGREEMENT**

| <b>Inter-reader</b> | <b>Baseline</b> | <b>1 year</b> | <b>Change</b> |
|---------------------|-----------------|---------------|---------------|
| Synovitis           | 0.98            | 0.96          | 0.87          |
| Tenosynovitis       | 0.97            | 0.94          | 0.90          |
| Bone marrow edema   | 0.96            | 0.95          | 0.94          |
| Erosion             | 0.92            | 0.97          | 0.94          |
| JSN                 | 0.60            | 0.43          | 0.61          |
| <b>Intra-reader</b> | <b>Baseline</b> | <b>1 year</b> | <b>Change</b> |
| Synovitis           | 0.95            | 0.98          | 0.88          |
| Tenosynovitis       | 0.94            | 0.97          | 0.88          |
| Bone marrow edema   | 0.89            | 0.97          | 0.86          |
| Erosion             | 0.98            | 0.95          | 0.81          |
| JSN                 | 0.93            | 0.92          | 0.95          |

*Inter-reader comparisons: 12 patients scored separately by D.Glinatsi and U.Sundin. Intra-reader comparisons: 12 patients scored on separate occasions by U.Sundin.*

**SUPPLEMENTARY TABLE 2: BASELINE CHARACTERISTICS**

|                                              | <b>Derivation Cohort*</b> | <b>Validation Cohort**</b> | <b>p-value</b> | <b>CIMESTRA</b> | <b>OPERA</b>     |
|----------------------------------------------|---------------------------|----------------------------|----------------|-----------------|------------------|
| <i>N</i>                                     | 194                       | 195                        |                | 123             | 72               |
| <i>Age at baseline, median (IQR)</i>         | 53 (42, 62)               | 53 (41, 62)                | 0.92           | 53 (42, 62)     | 54 (41, 62)      |
| <i>Female Sex, n (%)</i>                     | 121 (62.4%)               | 129 (66.2%)                | 0.44           | 84 (68.3%)      | 45 (62.5%)       |
| <i>Symptom Duration (days), median (IQR)</i> | 166.5 (85, 311)           | 91 (56, 133)               | <0.001         | 98 (77, 147)    | 66.5 (42, 119)   |
| <i>Pos. anti CCP Status, n (%)</i>           | 159 (82.0%)               | 120 (61.5%)                | <0.001         | 73 (59.3%)      | 47 (65.3%)       |
| <i>TJC28, median (IQR)</i>                   | 6 (2, 11)                 | 10 (6, 16)                 | <0.001         | 9 (5, 16)       | 10.5 (6.5, 16.5) |
| <i>SJC28, median (IQR)</i>                   | 5 (3, 10)                 | 8 (4, 12)                  | <0.001         | 9 (4, 12)       | 7 (4, 12)        |
| <i>Patient global, median (IQR)</i>          | 48 (29, 67)               | 54 (31, 74)                | 0.025          | 51 (29, 72)     | 57.5 (41.5, 77)  |
| <i>Physician global, median (IQR)</i>        | 35 (23, 50)               | 57 (41, 68)                | <0.001         | 58 (41, 68)     | 55 (41.5, 69)    |
| <i>Joint pain VAS, median (IQR)</i>          | 45 (27, 65)               | 50 (31, 70)                | 0.074          | 48 (28, 70)     | 52 (37, 73)      |
| <i>CRP, median (IQR)</i>                     | 7 (3, 18)                 | 18.3 (8, 40)               | <0.001         | 19.6 (9, 41)    | 15 (7, 38)       |
| <i>DAS28, median (IQR)</i>                   | 4.4 (3.6, 5.0)            | 5.3 (4.6, 5.9)             | <0.001         | 5.2 (4.5, 5.9)  | 5.45 (4.8, 6)    |

*\*Derivation cohort: ARCTIC. \*\*Validation cohort: CIMESTRA+OPERA. P-value: Probability of no difference between cohorts, tested by Wilcoxon rank-sum test for median values, and by Pearson's chi-square for proportions. Abbreviations: Anti CCP: anti-cyclic citrullinated peptide. CRP: C-Reactive Protein (mg/L). DAS: Disease Activity Score (28-joints, range 0-10). SJC: Swollen Joint Count (28 joints). TJC: Tender Joint Count (28 joints). VAS: Visual Analog Scale (0-100).*

**SUPPLEMENTARY TABLE 3A: BASELINE CONVENTIONAL RADIOGRAPHY (CR) AND MRI SCORES, MEDIAN VALUES (IQR)**

|                                 | <b>Derivation Cohort*</b> | <b>Validation Cohort**</b> | <b>p-value</b> | <b>CIMESTRA</b> | <b>OPERA</b> |
|---------------------------------|---------------------------|----------------------------|----------------|-----------------|--------------|
| <i>N</i>                        | 194                       | 195                        |                | 123             | 72           |
| <i>RAMRIS Synovitis</i>         | 5 (3, 9)                  | 8 (5.5, 11)                | <0.001         | 8 (5, 11)       | 9 (6, 12)    |
| <i>RAMRIS Tenosynovitis</i>     | 4 (2, 10)                 | 4.5 (2, 11)                | 0.92           | 3 (1, 8)        | 9 (4, 14)    |
| <i>RAMRIS Bone marrow edema</i> | 1 (0, 5)                  | 0 (0, 2)                   | <0.001         | 0 (0, 2)        | 0 (0, 3)     |
| <i>RAMRIS Erosion</i>           | 1 (0, 3)                  | 2 (0, 3)                   | 0.98           | 1 (0, 3)        | 2 (1, 4)     |
| <i>RAMRIS JSN</i>               | 15 (10, 20)               | 0 (0, 0)                   | <0.001         | 0 (0, 0)        | 0 (0, 0)     |
| <i>CR Erosion</i>               | 3 (1, 5)                  | 1 (0, 4)                   | <0.001         | 1 (0, 6)        | 1 (0, 2)     |
| <i>CR JSN</i>                   | 1 (0, 3.5)                | 0 (0, 3)                   | 0.01           | 0 (0, 3)        | 2 (0, 3.5)   |
| <i>CR Total</i>                 | 4.5 (1.5, 9)              | 3 (0, 7)                   | <0.001         | 3 (0, 8)        | 3 (1, 6)     |

| <b>SUPPLEMENTARY TABLE 3B: 1 YEAR CHANGE IN CR AND MRI SCORES, MEDIAN VALUES (IQR)</b>                                                                    |                           |                            |                |                 |                |
|-----------------------------------------------------------------------------------------------------------------------------------------------------------|---------------------------|----------------------------|----------------|-----------------|----------------|
|                                                                                                                                                           | <b>Derivation Cohort*</b> | <b>Validation Cohort**</b> | <b>p-value</b> | <b>CIMESTRA</b> | <b>OPERA</b>   |
| <i>N</i>                                                                                                                                                  | 194                       | 195                        |                | 123             | 72             |
| <i>RAMRIS Synovitis</i>                                                                                                                                   | -2 (-5, 0)                | -2 (-5, 0)                 | 0.82           | -2.5 (-5, 0)    | -2.5 (-4, 0.5) |
| <i>RAMRIS Tenosynovitis</i>                                                                                                                               | -3 (-7, 0)                | -3 (-8, 0)                 | 0.97           | -2 (-6, 0)      | -5 (-10, -1)   |
| <i>RAMRIS Bone marrow edema</i>                                                                                                                           | 0 (-2, 0)                 | 0 (-1, 0)                  | 0.36           | 0 (-1, 0)       | 0 (-2, 0)      |
| <i>RAMRIS Erosion</i>                                                                                                                                     | 0 (0, 1)                  | 0 (0, 1)                   | 0.32           | 0 (0, 1)        | 0 (0, 1)       |
| <i>RAMRIS JSN</i>                                                                                                                                         | 0 (0, 1)                  | 0 (0, 0)                   | 0.011          | 0 (0, 0)        | 0 (0, 0)       |
| <i>CR Erosion</i>                                                                                                                                         | 0.5 (0, 1)                | 0 (0, 0)                   | <0.001         | 0 (0, 0)        | 0 (0, 1)       |
| <i>CR JSN</i>                                                                                                                                             | 0 (0, 0)                  | 0 (0, 0)                   | 0.003          | 0 (0, 0)        | 0 (0, 0)       |
| <i>CR Total</i>                                                                                                                                           | 0.5 (0, 1.5)              | 0 (0, 1)                   | <0.001         | 0 (0, 0)        | 0 (-0.5, 1)    |
| *Derivation cohort: ARCTIC. **Validation cohort: CIMESTRA+OPERA. P-value: Probability of no difference between cohorts, tested by Wilcoxon rank-sum test. |                           |                            |                |                 |                |
